# Supplementary material
Source: Springer Nature journal article supplement (https://www.springermedizin.de/resource/supplementary/13643_2014_310_MOESM3_ESM.pdf/9681740)
Supplement: MOESM3 [file 9681740]

## Search Strategy\*

| Step | Search Terms                                                                                                              |
|------|---------------------------------------------------------------------------------------------------------------------------|
| 1    | Osteoarthritis [Title].                                                                                                   |
| 2    | Knee [Title/Abstract].                                                                                                    |
| 3    | AND/1-2                                                                                                                   |
| 4    | Exercise therapy [Mesh].                                                                                                  |
| 5    | Electric stimulation therapy [Mesh].                                                                                      |
| 6    | Hydrotherapy [Mesh].                                                                                                      |
| 7    | Diathermy [Mesh].                                                                                                         |
| 8    | Musculoskeletal manipulations [Mesh].                                                                                     |
| 9    | OR/4-8                                                                                                                    |
| 10   | Pain [Title/Abstract].                                                                                                    |
| 11   | Randomized controlled trial [Publication Type].                                                                           |
| 12   | English [Language].                                                                                                       |
| 13   | 3 AND 9 AND 10 AND 11 AND 12                                                                                              |
| 14   | Surgery[All Fields]. OR Arthroplasty[All Fields]. OR Protocol[All Fields]. OR Pilot[All Fields]. OR "Drug therapy"[Mesh]. |
| 15   | 13 NOT 14                                                                                                                 |

\*Search strategy conducted on PubMed (<http://www.ncbi.nlm.nih.gov/pubmed>). The search was last updated on 20 March 2014.
